# Supplementary material for: The hepatic AMPK-TET1-SIRT1 axis regulates glucose homeostasis
Source: eLife journal article supplement (doi:10.7554/elife.70672), 2021-11-05
Supplement: fig2-figsupp1-data1 [file elife-70672-fig2-figsupp1-data1-v3.pdf]

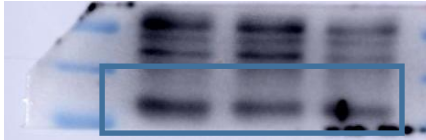

Original Data is used for Figure 2 Supplement 1B  
Line 1

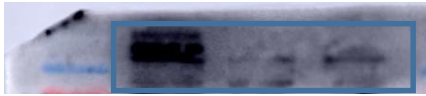

Original Data is used for Figure 2 Supplement 1B  
Line 2

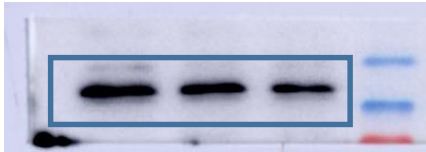

Original Data is used for Figure 2 Supplement 1B Line 3

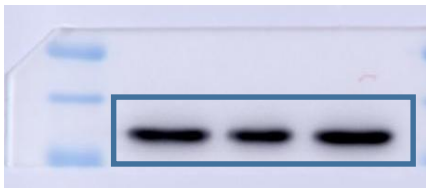

Original Data is used for Figure 2 Supplement 1B Line 4
