# Supplementary material for: The hepatic AMPK-TET1-SIRT1 axis regulates glucose homeostasis
Source: eLife. 2021 Nov 5;10:e70672. doi: 10.7554/eLife.70672 (PMC8592569; doi:10.7554/eLife.70672)
Supplement: Supplementary file 1. [file elife-70672-supp1.docx]

**Supplementary file 1. List of primers**

| **Cloning primers** |
| --- |
| | TET1 1-654aa. S | CCGCTCGAGATGTCTCGATCCCGCCATGCAAGG | | --- | --- | | TET1 1-654aa. A | CCCTCTAGATCAAACTTTGGGCTTCTTTTCCCT | | TET1 620-1590aa. S | CCGCTCGAGATGAAGAAAAGAAAATGTGAGGAG | | TET1 620-1590aa. A | CCCTCTAGATCAAAACTTACAGCCATTAAAGTA | | TET1 1418-2138aa. S | GCTGAATTCATGGAACTGCCCACCTGCAGCTGTC | | TET1 1418-2138aa. A | CCCTCTAGATCAGACCCAATGGTTATAGGGCCC | |
| **Real time PCR primers** |
| | *G6PC*. S | GCAGGTGTATACTACGTGATGGT | | --- | --- | | *G6PC*. A | GACATTCAAGCACCGAAATCTG | | *PPARGC1A*. S | TGACTGGCGTCATTCAGGAG | | *PPARGC1A*. A | CCAGAGCAGCACACTCGAT | | *SLC2A4*. S | GGGAAGGAAAAGGGCTATGCTG | | *SLC2A4*. A | CAATGAGGAACCGTCCAAGAATG | | *TET1*. S | GGAATGGAAGCCAAGATCAA | | *TET1*. A | ACTCCCTAAGGTTGGCAGTG | | *PCK1*.S | ATCCCCAAAACAGGCCTCAG | | *PCK1*. A | ACGTACATGGTGCGACCTTT | | *ACTB*. S | TACTGCCCTGGCTCCTAGCA | | *ACTB*. A | GCCAGGATAGAGCCACCAATC | | *Sirt1*. S | CAGACCCTCAAGCCATGTTT | | *Sirt1*. A | CTTTGGATTCCTGCAACCTG | | *Sirt6*. S | ATCTTCGACCCACCAGAGG | | *Sirt6*. A | GCATTCTCGAAGGTGGTGTC | | *Tet1*. S | GACCCTCATAAGCAGAGAGGAAA | | *Tet1*. A | TGACACCAGAGAAAGGACGC | | *G6pc*. S | AAGAGCGCAACAGTTCCCTT | | *G6pc*. A | CTCTGGCCTCACAATGGGTT | | *Slc2a4*. S | GGGAAGGAAAAGGGCTATGCTG | | *Slc2a4*. A | CAATGAGGAACCGTCCAAGAATG | | *Ppargc1a*. S | TCTCAGTAAGGGGCTGGTTG | | *Ppargc1a*. A | AGCAGCACACTCTATGTCACTC | | *Actb*. S | CTACCTCATGAAGATCCTGACC | | *Actb*. A | GAACCGCTCGTTGCCAATAGTG | | *ALDH1A3*. S | GGGCCTCAGATCGACCAAAA | | *ALDH1A3*. A | GCTGCACTGGTCCGAAAATC | | *ALDOA*. S | AGCTGAATAGGCTGCGTTCT | | *ALDOA*. A | GACAGGCGGGTCATGTTGAA | |
|
|

**hMeDIP PCR primers**

*G6PC*.S ATGGCCGATCAGGCTGTTTT

*G6PC*.A CCAGCCCTGATCTTTGGACT

*PPARGC1A*.S GATTGGCAATGGGAGCAACC

*PPARGC1A*.A AGACACATCGTGCTGTCAGG

*SLC2A4*.S AACTTGGCAATTGGGGCAAC

*SLC2A4*.A GCTGCCACTTCAGTCCAGAT
